# Supplementary material for: Involvement of adiponectin in the pathogenesis of dystrophinopathy
Source: PubMed Central journal article supplement (PMC4528853; doi:10.1186/s13395-015-0051-9), 2015-08-07
Supplement: 13395_2015_51_MOESM1_ESM.pdf [file 13395_2015_51_MOESM1_ESM.pdf]

## SUPPLEMENTARY INFORMATION

### Additional file 1: Figure S1

**Fig.S1.**

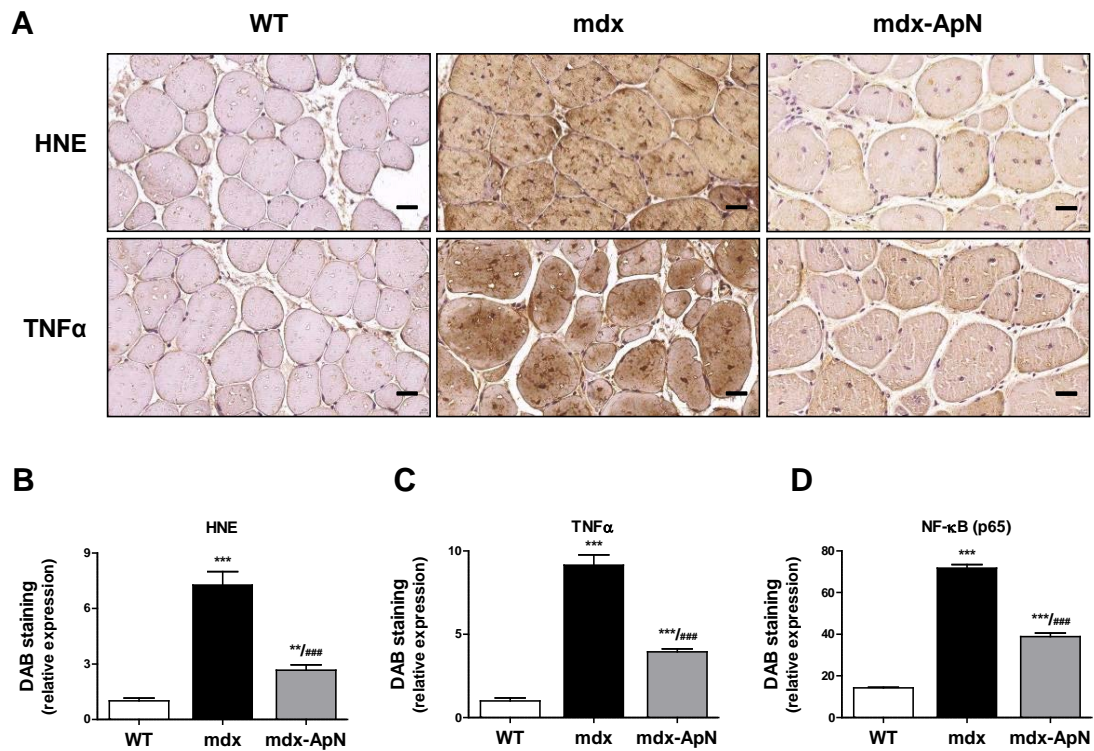

**Fig. S1. Effects of adiponectin on markers of oxidative stress and inflammation in muscles of 1 yr-old mdx mice.** (A) *Tibialis anterior* muscles were sampled from 1 yr-old WT mice, mdx mice or mdx mice overexpressing adiponectin (mdx-ApN). Immunodetection was performed with specific antibodies directed against one pro-inflammatory cytokine (TNF $\alpha$ ), and one oxidative stress marker (HNE). Scale bar = 25  $\mu$ m. (B) HNE and (C) TNF $\alpha$  immunolabeling, the percentage of DAB deposit areas was calculated within the muscle fibers. (D) Quantification of p65 immunolabeling in myofiber nuclei (expressed as percent of total nuclei). Data are means  $\pm$  SD for 4 mice and are presented relative to DAB ratio in WT mice.

\*\*  $p < 0.01$ , \*\*\*  $p < 0.001$  vs. WT. ###  $p < 0.001$  vs. mdx.

## **Additional file 2: Movie S2**

### **Movie S2. Effects of adiponectin on mdx mice subjected to downhill treadmill running.**

Mice ( $n=6$ /group) were subjected to an eccentric exercise consisting of a 10 min downhill running on a treadmill with an inclination of  $15^\circ$ , at a speed of 10 m/min, and then repeated daily for 3 days. When mice stopped exercising, a mild electrical current was discharged by an electric grid (indicated by a star) to keep them running on the treadmill. A representative video shows the difference of global muscular force between a regular mdx mouse (on the right) and a mdx-ApN mouse (on left) on the 3rd day. Mdx mice struggled during the last session of the exercise and remained most of the time on -or nearby- the electric grid, while most mdx-ApN mice completed the exercise.
